# Supplementary material for: Mitochondrial and Peroxisomal Alterations Contribute to Energy Dysmetabolism in Riboflavin Transporter Deficiency
Source: Hindawi journal article supplement (doi:10.1155/2020/6821247), 2020-08-13
Supplement: f1 [file 6821247.f1.pdf]

**Supplementary Figure 1**

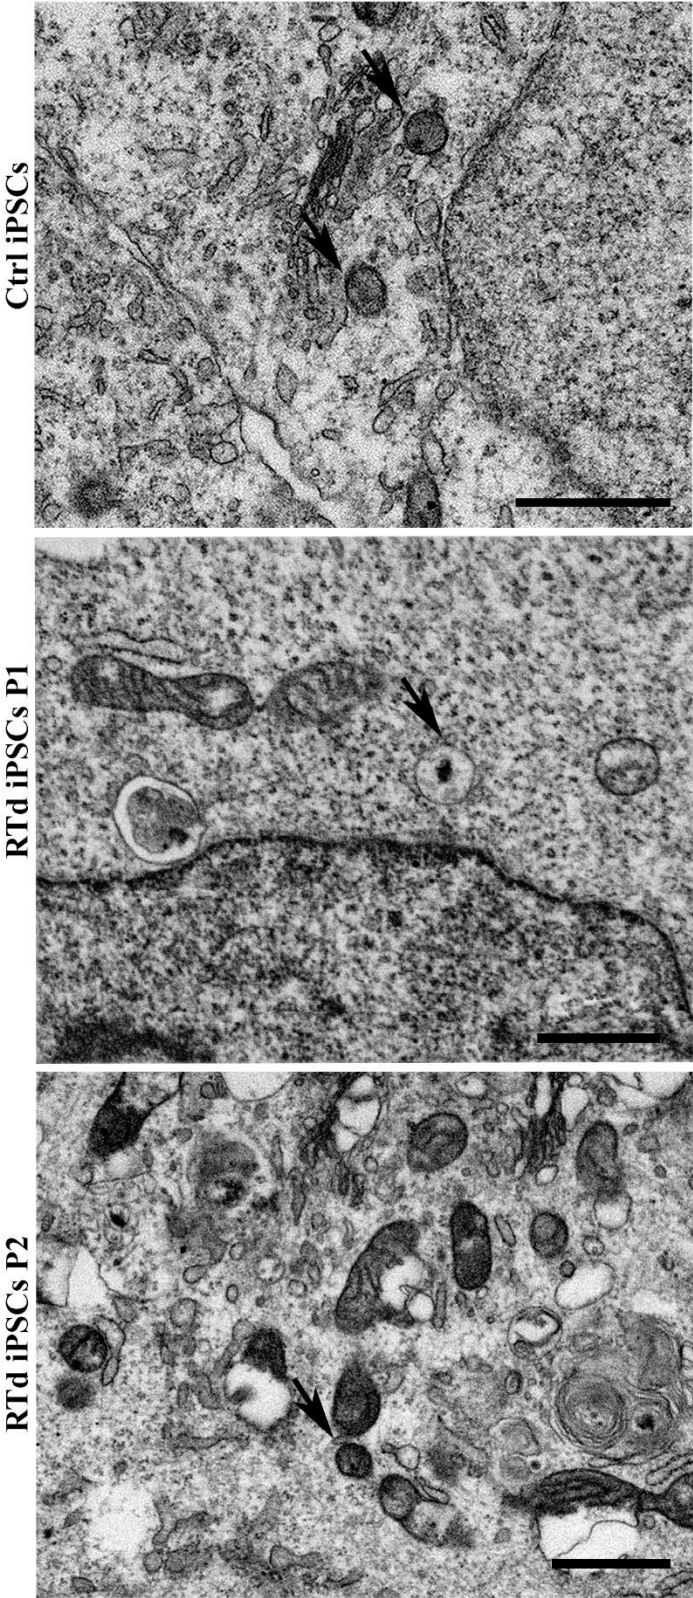

Figure S1: FIB/SEM micrographs showing peroxisomes (Black arrows) in Ctrl iPSCs and RTD cells. These organelles are hardly detectable in RTD cells.

**Supplementary Figure 2**

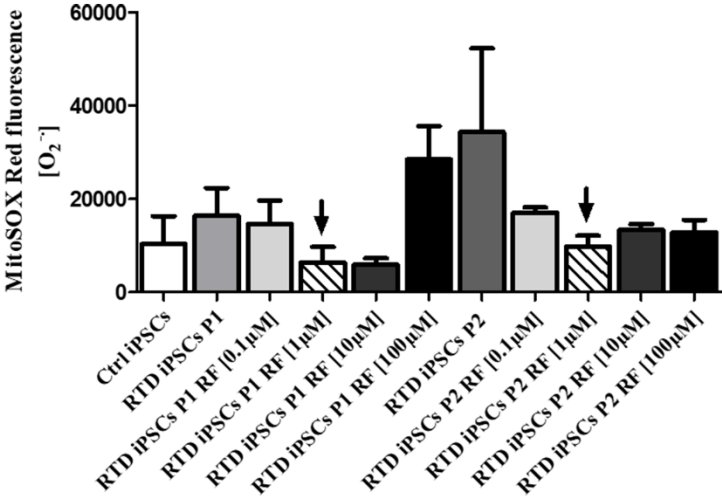

Figure S2: Dose-response effect of RF treatment assessed by MitoSOX Red assay. Black arrows indicate riboflavin 1 µM, which can lower mitochondria superoxide anion levels.
